# Supplementary material for: The peptide Acein promotes dopamine secretion through clec-126 to extend the lifespan of elderly C. elegans
Source: publisher site journal article supplement (doi:10.18632/aging.205150), 2023-12-27
Supplement: Supplementary file [file aging-v15i24-205150-supplementary-material-SD2.pdf]

## SUPPLEMENTARY TABLES

**Supplementary Table 1. Differentially expressed genes.**

| Gene name       | Gene description                          | Gene length | Protein length | Ortholog | Function prediction                                                                                                         |
|-----------------|-------------------------------------------|-------------|----------------|----------|-----------------------------------------------------------------------------------------------------------------------------|
| <i>T02D1.7</i>  | Uncharacterized protein                   | 225         | 74             | none     | none                                                                                                                        |
| <i>nspf-3</i>   | Nematode Specific Peptide family, group F | 264         | 87             | none     | none                                                                                                                        |
| <i>col-41</i>   | Collagen composition                      | 1450        | 428            | none     | Predicted to be a structural component of the stratum corneum, expressed in subcutaneous tissue and vulvar precursor cells. |
| <i>clec-126</i> | C-type lectin structural domain protein   | 1217        | 168            | CLEC4G   | Predicted to have carbohydrate-binding activity.                                                                            |
| <i>Y34F4.3</i>  | PAP-associated structural domain protein  | 4015        | 121            | none     | none                                                                                                                        |

**Supplementary Table 2. Information about *clec-126*.**

| Gene description | <i>clec-126</i>                                  |
|------------------|--------------------------------------------------|
| Gene name        | C-type lectin structural domain protein          |
| Location         | Chromosome II of <i>Caenorhabditis elegans</i>   |
| Gene length      | 1217                                             |
| Protein length   | 168                                              |
| Protein location | –                                                |
| Function         | Predicted to have carbohydrate-binding activity. |

**Supplementary Table 3. Purity and yield of synthesized Acein.**

|                                   | Acein  |
|-----------------------------------|--------|
| Purity of crude product (%)       | 82.40  |
| Purity of pure product (%)        | 97.50  |
| Amount of crude product (mg)      | 304.80 |
| Amount of pure product (mg)       | 225.66 |
| Yield of peptide purification (%) | 74.04  |
